# Supplementary material
Source: Springer Nature journal article supplement (https://www.springermedizin.de/resource/supplementary/12967_2012_999_MOESM4_ESM.pdf/9573276)

**A****Mitochondria membrane potential****shRNAs**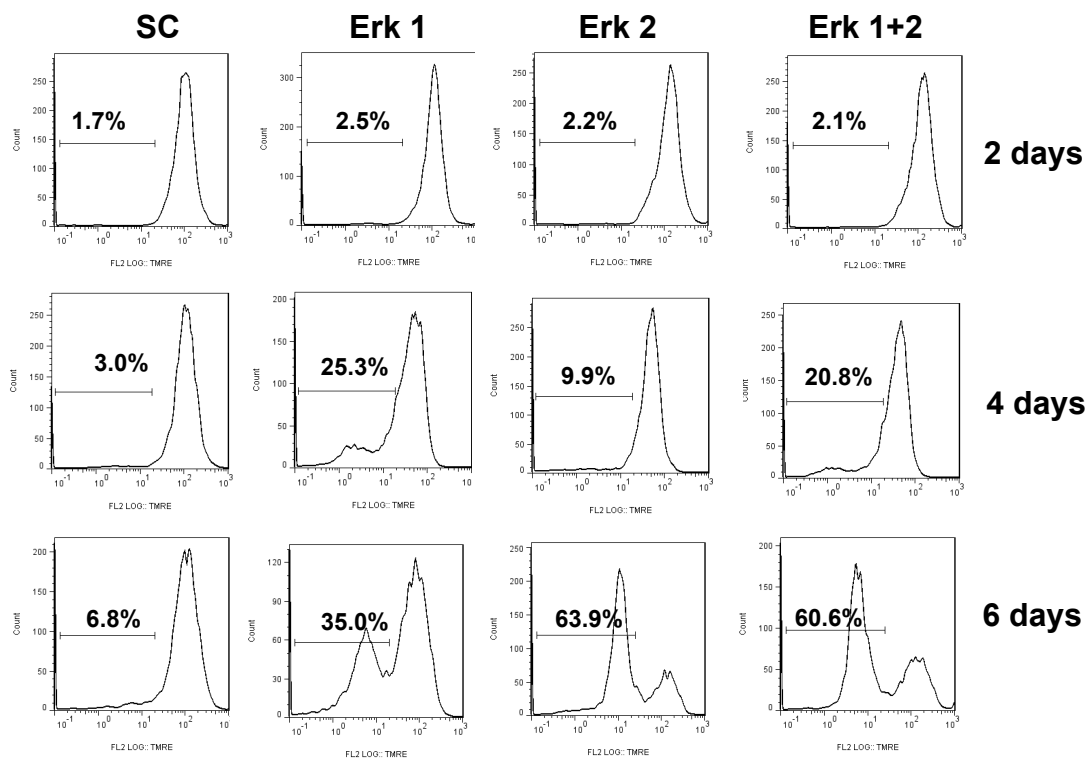**Bax activation**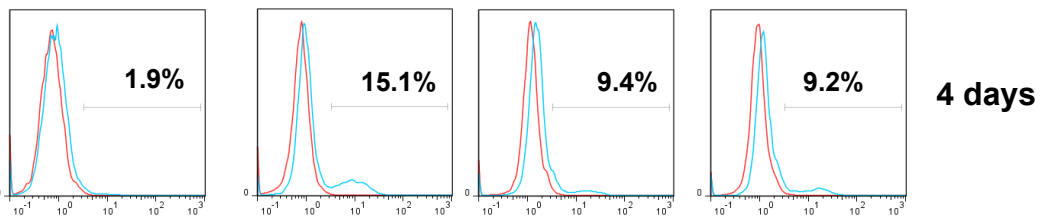**B****4 days  
shRNAs**

SC E1 E2 E1/2

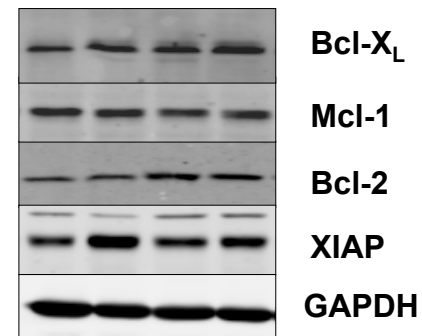**shRNAs**

SC E1 E2 E1/2

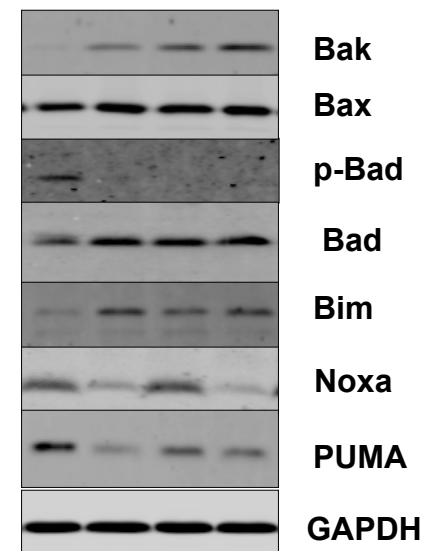

Supplement: MOESM4 [file 9573276]
